# Supplementary material for: Separation of p-xylene from aromatic compounds through specific inclusion by acyclic host molecule
Source: Royal Society of Chemistry journal article supplement (doi:10.1039/c8ce01101j), 2018-01-01
Supplement: c8ce01101j1.pdf [file c8ce01101j1.pdf]

## Supplementary Information

### Separation of *p*-xylene from aromatic compounds through specific inclusion by acyclic host molecule

Masatoshi Kawahata,\* Tadashi Hyodo, Masahide Tominaga and Kentaro Yamaguchi\*

Faculty of Pharmaceutical Sciences at Kagawa Campus, Tokushima Bunri University, 1314-1 Shido, Sanuki, Kagawa 769-2193, Japan

E-mail: kawahatam@ac.shoyaku.ac.jp and kyamaguchi@kph.bunri-u.ac.jp

#### Table of Contents

|                                                                                                                                                 |    |
|-------------------------------------------------------------------------------------------------------------------------------------------------|----|
| <b>General Information</b>                                                                                                                      | S2 |
| <b>Fig. S1</b> Partial <sup>1</sup> H NMR spectra; (a) crystal <b>1</b> , (b) <i>p</i> -xylene, and (c) crystal <b>1</b> ·0.5 <i>p</i> -xylene. |    |
| <b>Fig. S2</b> Additional crystal data for crystal <b>1</b> ·0.5 <i>p</i> -xylene.                                                              | S3 |
| <b>Fig. S3</b> Additional crystal data for crystal <b>1</b> .                                                                                   | S4 |
| <b>Fig. S4</b> The 2D fingerprint plots of specified interactions of <i>p</i> -xylene in <b>1</b> ·0.5 <i>p</i> -xylene.                        |    |
| <b>Fig. S5</b> Distribution of each interaction of <i>p</i> -xylene in crystal <b>1</b> ·0.5 <i>p</i> -xylene.                                  | S5 |
| <b>Fig. S6</b> The 2D fingerprint plots of specified interactions of <b>1</b> in crystal <b>1</b> ·0.5 <i>p</i> -xylene.                        |    |
| <b>Fig. S7</b> The 2D fingerprint plots of specified interactions of <b>1</b> in crystal <b>1</b> .                                             |    |
| <b>Fig. S8</b> Distribution of each interactions of <b>1</b> in crystals <b>1</b> ·0.5 <i>p</i> -xylene and <b>1</b> .                          | S6 |

## General Information

All reagents and solvents were obtained from commercial suppliers and used without further purification. The synthesis of compound **1** was performed according to the previously reported literature.<sup>1</sup>  $^1\text{H}$  and  $^{13}\text{C}$  NMR spectra were performed on a Bruker AV400 spectrometer in  $\text{CDCl}_3$  using tetramethylsilane as an internal standard at 298 K. X-ray crystal structure data were collected using a Bruker D8 VENTURE diffractometer with  $\text{CuK}\alpha$  radiation.

(1) M. Tominaga, N. Kunitomi, K. Katagiri and T. Itoh, *Org. Lett.*, 2015, **17**, 786–789.

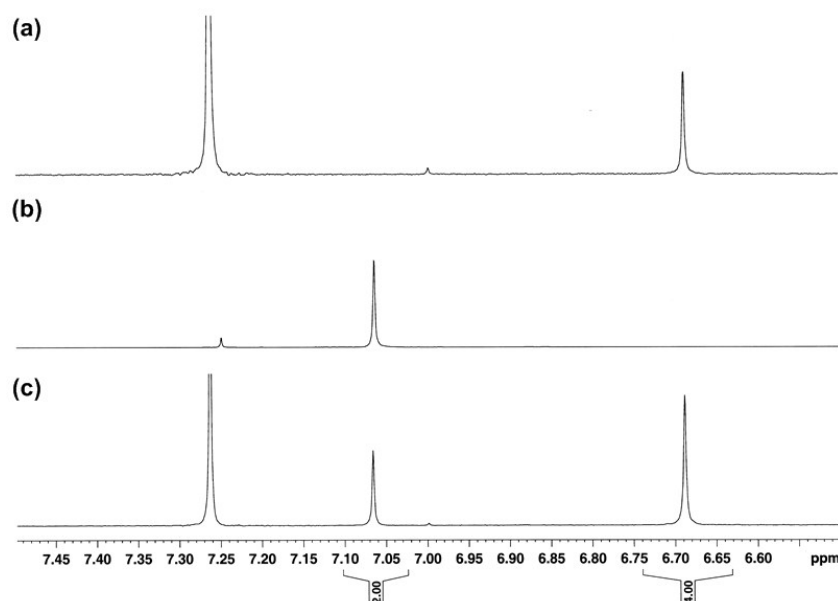

**Fig. S1** Partial  $^1\text{H}$  NMR spectra (400 MHz,  $\text{CDCl}_3$ ); (a) crystal **1**, (b) *p*-xylene, and (c) crystal **1**·0.5*p*-xylene.

### Single crystal X-ray diffraction experiment for 1·0.5*p*-xylene

The colourless plate crystal ( $0.200 \times 0.120 \times 0.050$  mm<sup>3</sup>), obtained from chloroform/*p*-xylene, was immersed in Paraton-N oil and placed in the N<sub>2</sub> cold stream at 100 K. The diffraction experiment was performed in a Bruker D8VENTURE system (PHOTON-100 CMOS detector, CuK $\alpha$ :  $\lambda = 1.54178$  Å). Absorption correction was performed by an empirical method implemented in SADABS.<sup>2</sup> Structure solution and refinement were performed by using SHELXT-2014/5<sup>3</sup> and SHELXL-2016/6<sup>4</sup>.

C<sub>38</sub>H<sub>39</sub>Cl<sub>2</sub>N<sub>4</sub>O<sub>6</sub>,  $M_r = 718.63$ ; triclinic, space group *P*-1,  $Z = 2$ ,  $D_{\text{calc}} = 1.424$  g·cm<sup>-3</sup>,  $a = 10.7680(5)$ ,  $b = 12.2601(6)$ ,  $c = 13.3043(6)$  Å,  $\alpha = 97.054(2)^\circ$ ,  $\beta = 101.999(2)^\circ$ ,  $\gamma = 98.839(2)^\circ$ ,  $V = 1675.71(14)$  Å<sup>3</sup>, 22483 observed and 5948 independent [ $I > 2\sigma(I)$ ] reflections, 456 parameters, final  $R_1 = 0.0372$ ,  $wR_2 = 0.0960$ ,  $S = 1.033$  [ $I > 2\sigma(I)$ ]. CCDC 1842175

All non-hydrogen atoms were refined anisotropically. Hydrogen atoms were refined isotropically on the calculated positions using a riding model (AFIX 13, 137, 23 and 43) with  $U_{\text{iso}}$  values constrained to 1.2/1.5  $U_{\text{eq}}$  of their parent atoms.

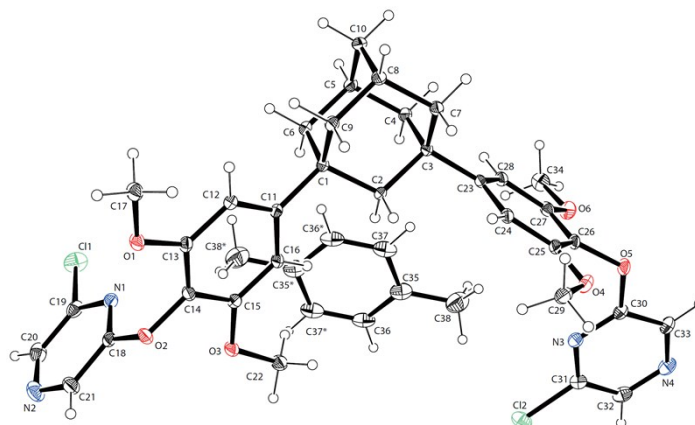

**Fig. S2** Ortep drawing of crystal 1·0.5*p*-xylene (50% probability).

### Single crystal X-ray diffraction experiment for **1**

The colourless prismatic crystal ( $0.100 \times 0.100 \times 0.040$  mm<sup>3</sup>), obtained from *o*-xylene/chloroform, was immersed in Paraton-N oil and placed in the N<sub>2</sub> cold stream at 100 K. The diffraction experiment was performed in a Bruker D8VENTURE system (PHOTON-100 CMOS detector, CuK $\alpha$ :  $\lambda = 1.54178$  Å). Absorption correction was performed by an empirical method implemented in SADABS.<sup>2</sup> Structure solution and refinement were performed by using SHELXT-2014/5<sup>3</sup> and SHELXL-2016/6<sup>4</sup>.

C<sub>34</sub>H<sub>34</sub>Cl<sub>2</sub>N<sub>4</sub>O<sub>6</sub>, *Mr* = 665.55; monoclinic, space group *C2/c*, *Z* = 4, *D*<sub>calc</sub> = 1.417 g·cm<sup>-3</sup>, *a* = 23.5127(11), *b* = 7.1104(3), *c* = 19.6874(9) Å,  $\beta$  = 108.636(2)°, *V* = 3118.9(2) Å<sup>3</sup>, 20154 observed and 3022 independent [*I* > 2 $\sigma$ (*I*)] reflections, 211 parameters, final *R*<sub>1</sub> = 0.0307, *wR*<sub>2</sub> = 0.0867, *S* = 1.092 [*I* > 2 $\sigma$ (*I*)]. CCDC 1842176

All non-hydrogen atoms were refined anisotropically. The hydrogen atoms were refined isotropically on the calculated positions using a riding model (AFIX 13, 137, 23 and 43) with *U*<sub>iso</sub> values constrained to 1.2/1.5 *U*<sub>eq</sub> of their parent atoms.

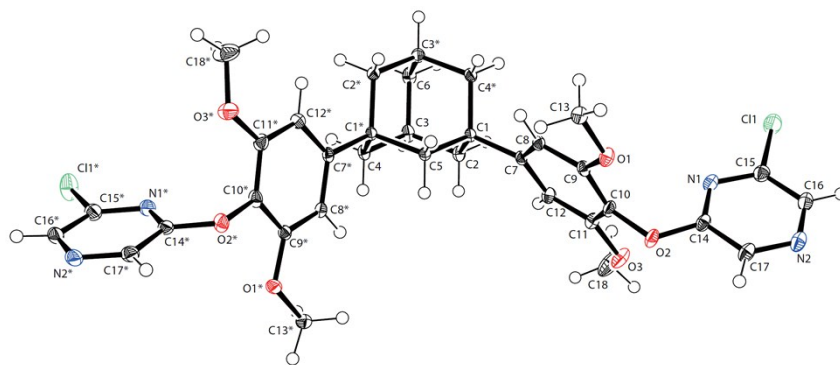

**Fig. S3** Ortep drawing of crystal **1** (50% probability).

(2) G. M. Sheldrick, (1996). *SADABS*. University of Göttingen, Germany.

(3) G. M. Sheldrick, *Acta. Cryst.*, 2015, **A71**, 3–8.

(4) G. M. Sheldrick, *Acta. Cryst.*, 2015, **C71**, 3–8.

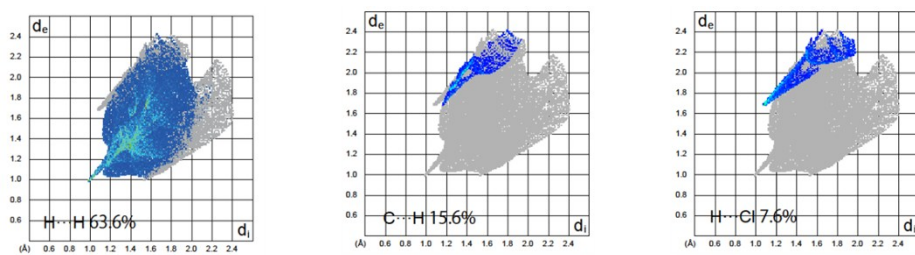

**Fig. S4** The 2D fingerprint plots focusing on the specific interactions of *p*-xylene in crystal  $1 \cdot 0.5p$ -xylene.

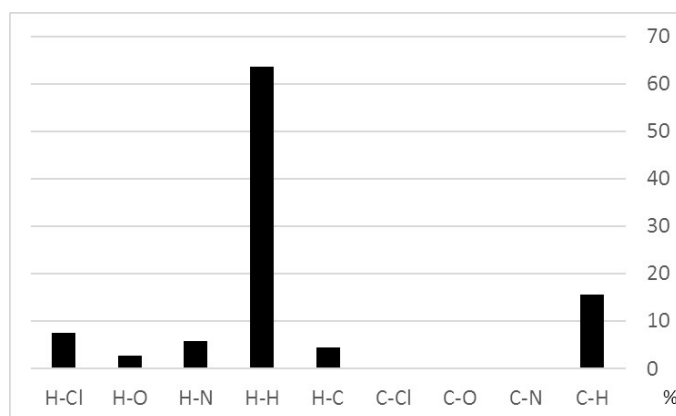

**Fig. S5** Distribution of each interactions of *p*-xylene in crystal  $1 \cdot 0.5p$ -xylene.

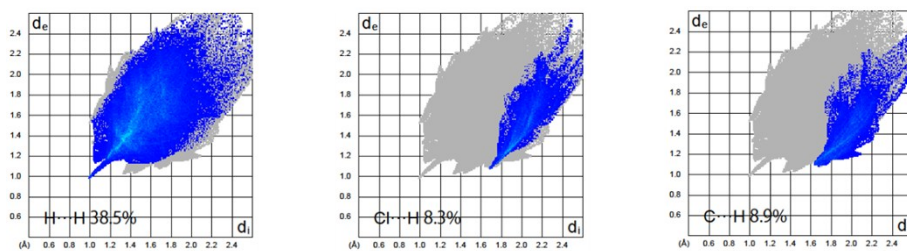

**Fig. S6** The 2D fingerprint plots focusing on the specific interactions of **1** in crystal **1·0.5p**-xylene.

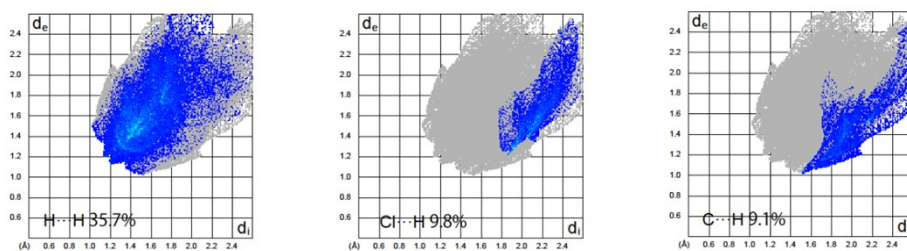

**Fig. S7** The 2D fingerprint plots focusing on the specific interactions of **1** in crystal **1**.

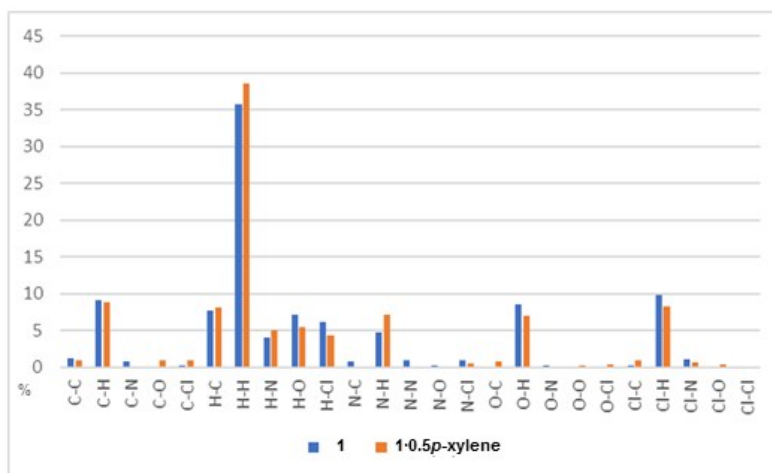

**Fig. S8** Distribution of each interactions of **1** in crystal **1·0.5p**-xylene and **1** in crystal **1**.
